# Supplementary material for: Research use of electronic health records: patients’ perspectives on contact by researchers
Source: PubMed Central journal article supplement — J Am Med Inform Assoc. 2018 Jul 6;25(9):1122–9. doi: 10.1093/jamia/ocy087 (PMC6118867; doi:10.1093/jamia/ocy087), 2018-07-06

# Appendix S1. Is physician notification acceptable?

## Vignette 1

Yes = 104 (95%)  
No = 6 (5%)

Yes  
n = 104  
(95%)

No  
n = 6  
(5%)

## Vignette 2

Yes = 105 (95%)  
No = 5 (5%)

Yes  
n = 102  
(93%)

No  
n = 2  
(2%)

Yes  
n = 3  
(3%)

No  
n = 3  
(3%)

## Vignette 3

Yes = 83 (75%)  
No = 27 (25%)

Yes  
n = 81  
(74%)

No  
n = 21  
(19%)

Yes  
n = 1  
(1%)

No  
n = 1  
(1%)

Yes  
n = 1  
(1%)

No  
n = 2  
(2%)

Yes  
n = 0  
(0%)

No  
n = 3  
(3%)

# Appendix S2. Is patient notification acceptable?

## Vignette 1

Yes = 42 (38%)  
No = 68 (62%)

Yes  
n = 42  
(38%)

No  
n = 68  
(62%)

## Vignette 2

Yes = 44 (40%)  
No = 66 (60%)

Yes  
n = 33  
(30%)

No  
n = 9  
(8%)

Yes  
n = 11  
(10%)

No  
n = 57  
(52%)

## Vignette 3

Yes = 29 (26%)  
No = 81 (74%)

Yes  
n = 23  
(21%)

No  
n = 10  
(9%)

Yes  
n = 1  
(1%)

No  
n = 8  
(7%)

Yes  
n = 4  
(4%)

No  
n = 7  
(6%)

Yes  
n = 1  
(1%)

No  
n = 56  
(51%)

# Appendix S3. Most appropriate approach

## Vignette 1

MD = 84 (76%)  
 Patient = 15 (14%)  
 Nothing = 11 (10%)

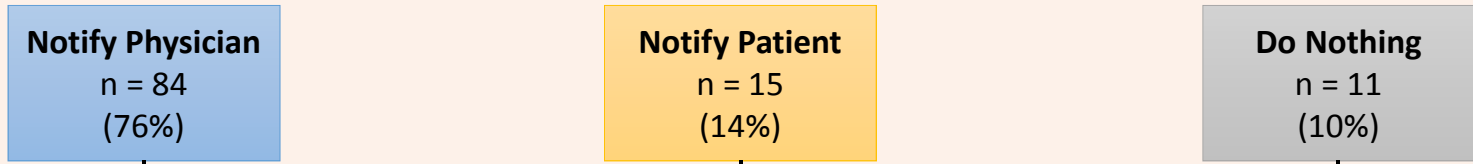

## Vignette 2

MD = 81 (74%)  
 Patient = 22 (20%)  
 Nothing = 7 (6%)

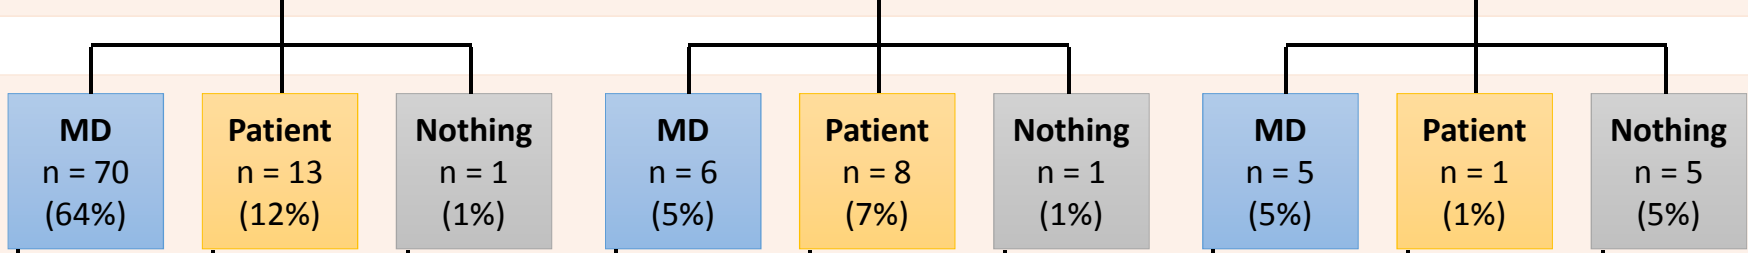

## Vignette 3

MD = 59 (54%)  
 Patient = 13 (12%)  
 Nothing = 38 (35%)

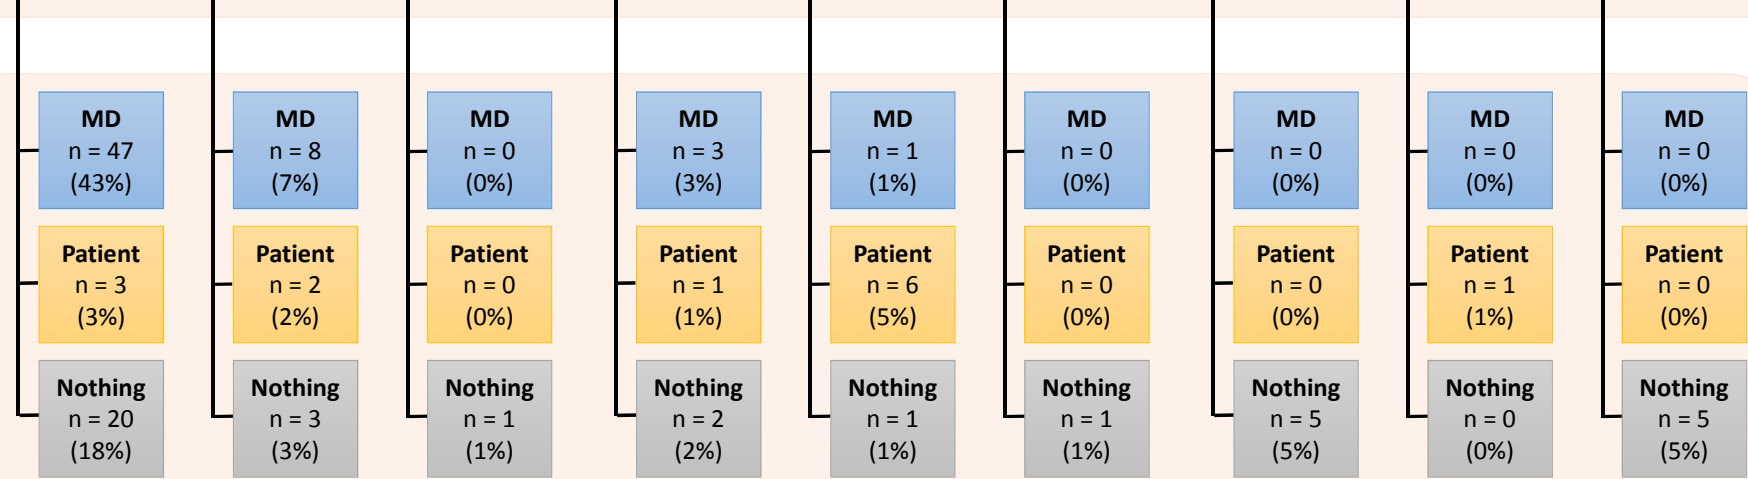

Supplement: ocy087_supp.pdf [file ocy087_supp.pdf]
